# Supplementary material for: Photosynthesis-inspired H2 generation using a chlorophyll-loaded liposomal nanoplatform to detect and scavenge excess ROS
Source: PubMed Central journal article supplement (PMC6985250; doi:10.1038/s41467-020-14413-x), 2020-01-27
Supplement: 41467_2020_14413_MOESM1_ESM.pdf [file 41467_2020_14413_MOESM1_ESM.pdf]

## **Supporting Information**

### **Photosynthesis-Inspired H<sub>2</sub> Generation Using a Chlorophyll-Loaded Liposomal Nanoplatfom to Detect and Scavenge Excess ROS**

Wan et al.

Supplementary Table 1. Sizes of Lip NPs before and after Various Treatments (n = 6). Source data are provided as Source Data file.

| Before Treatment | NIR Treatment   | H <sub>2</sub> O <sub>2</sub> Treatment | NIR+H <sub>2</sub> O <sub>2</sub> Treatment |
|------------------|-----------------|-----------------------------------------|---------------------------------------------|
| 209.8 ± 12.3 nm  | 217.0 ± 15.3 nm | 193.4 ± 9.3 nm                          | 193.0 ± 16.3 nm                             |

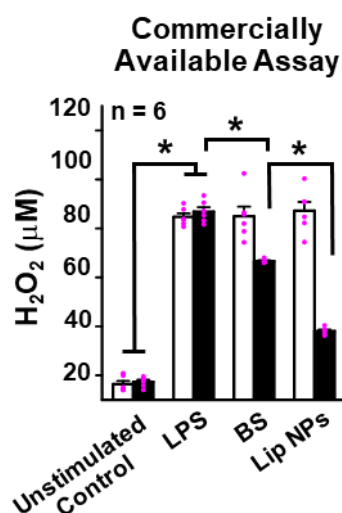

Supplementary Figure 1. Remaining H<sub>2</sub>O<sub>2</sub> Concentrations. Concentrations of H<sub>2</sub>O<sub>2</sub> that remained following various treatments, estimated by commercially available assay. Data are represented as mean ± SE. Stars indicate significance in the two-tailed unpaired Student's *t* test; \**P* < 0.05. Each pink dot represents one observed data point. Source data are provided as Source Data file.
